# Supplementary material for: Delayed Time to Defibrillation after In-Hospital Cardiac Arrest
Source: Atypon-hosted journal article supplement (doi:10.1056/nejmoa0706467), 2008-01-02
Supplement: nejm_chan_9sa1.pdf [file nejm_chan_9sa1.pdf]

## Supplementary Appendix

This appendix has been provided by the authors to give readers additional information about their work.

Supplement to: Chan PS, Krumholz HM, Nichol G, et al. Delayed time to defibrillation after in-hospital cardiac arrest. *N Engl J Med* 2008;358:9-17.

## Online Appendix

**Table: Study Endpoints and Adjusted Survival Rates By Hospital Unit**

| ICU                             | ≤ 2 minutes<br>(n=2,910) | > 2 minutes<br>(n=816) | Adjusted OR*<br>(95% CI) | p-value |
|---------------------------------|--------------------------|------------------------|--------------------------|---------|
| <b>SURVIVAL OUTCOMES</b>        |                          |                        |                          |         |
| ROSC, n (%)                     | 2,018 (69.3%)            | 405 (49.6%)            | 0.47 (0.39, 0.55)        | <.001   |
| Alive at 24 Hours, n (%)        | 1,624 (55.8%)            | 283 (34.7%)            | 0.43 (0.36, 0.51)        | <.001   |
| Survival to Discharge, n (%)    | 1,136 (39.0%)            | 169 (20.7%)            | 0.43 (0.35, 0.53)        | <.001   |
| <b>SURVIVORS ONLY (n=1,305)</b> |                          |                        |                          |         |
| <b>NEUROLOGICAL OUTCOMES</b>    |                          |                        |                          |         |
|                                 | (n=923)                  | (n=136)                | 0.60 (0.41, 0.87)**      | 0.007** |
| No Major Deficits, n (%)        | 554 (60.0%)              | 66 (48.5%)             |                          |         |
| Major Disability or Coma, n (%) | 369 (40.0%)              | 70 (51.5%)             |                          |         |
| <b>FUNCTIONAL OUTCOMES</b>      |                          |                        |                          |         |
|                                 | (n=921)                  | (n=136)                | 0.62 (0.41, 0.95)**      | 0.03**  |
| No Major Deficits, n (%)        | 338 (36.7%)              | 37 (27.2%)             |                          |         |
| Major Disability or Coma, n (%) | 583 (63.3%)              | 99 (72.8%)             |                          |         |

---

| TELEMETRY                       | ≤ 2 minutes<br>(n=1,368) | > 2 minutes<br>(n=816) | Adjusted OR*<br>(95% CI) | p-value |
|---------------------------------|--------------------------|------------------------|--------------------------|---------|
| <b>SURVIVAL OUTCOMES</b>        |                          |                        |                          |         |
| ROSC, n (%)                     | 926 (67.7%)              | 433 (53.1%)            | 0.59 (0.49, 0.71)        | <.001   |
| Alive at 24 Hours, n (%)        | 799 (58.4%)              | 362 (44.4%)            | 0.60 (0.49, 0.72)        | <.001   |
| Survival to Discharge, n (%)    | 619 (45.3%)              | 230 (28.2%)            | 0.50 (0.41, 0.61)        | <.001   |
| <b>SURVIVORS ONLY (n=849)</b>   |                          |                        |                          |         |
| <b>NEUROLOGICAL OUTCOMES</b>    |                          |                        |                          |         |
|                                 | (n=538)                  | (n=201)                | 0.91 (0.64, 1.30)**      | 0.61**  |
| No Major Deficits, n (%)        | 326 (60.6%)              | 115 (57.2%)            |                          |         |
| Major Disability or Coma, n (%) | 212 (39.4%)              | 86 (42.8%)             |                          |         |
| <b>FUNCTIONAL OUTCOMES</b>      |                          |                        |                          |         |
|                                 | (n=534)                  | (n=201)                | 0.92 (0.62, 1.36)**      | 0.79**  |
| No Major Deficits, n (%)        | 170 (31.8%)              | 58 (28.9%)             |                          |         |
| Major Disability or Coma, n (%) | 364 (68.2%)              | 143 (71.1%)            |                          |         |

| <b>UNMONITORED</b>                     | <b>≤ 2 minutes<br/>(n=466)</b> | <b>&gt; 2 minutes<br/>(n=413)</b> | <b>Adjusted OR*<br/>(95% CI)</b> | <b>p-value</b> |
|----------------------------------------|--------------------------------|-----------------------------------|----------------------------------|----------------|
| <b>SURVIVAL OUTCOMES</b>               |                                |                                   |                                  |                |
| <i>ROSC, n (%)</i>                     | 221 (47.4%)                    | 165 (40.0%)                       | 0.73 (0.55, 0.98)                | 0.04           |
| <i>Alive at 24 Hours, n (%)</i>        | 184 (39.5%)                    | 120 (29.1%)                       | 0.61 (0.45, 0.83)                | 0.002          |
| <i>Survival to Discharge, n (%)</i>    | 108 (23.2%)                    | 56 (13.6%)                        | 0.52 (0.36, 0.75)                | <.001          |
| <b>SURVIVORS ONLY (n=164)</b>          |                                |                                   |                                  |                |
| <b>NEUROLOGICAL OUTCOMES</b>           |                                |                                   |                                  |                |
|                                        | <b>(n=88)</b>                  | <b>(n=44)</b>                     | 0.42 (0.08, 1.00)**              | 0.05**         |
| <i>No Major Deficits, n (%)</i>        | 51 (58.0%)                     | 16 (36.4%)                        |                                  |                |
| <i>Major Disability or Coma, n (%)</i> | 37 (42.0%)                     | 28 (63.6%)                        |                                  |                |
| <b>FUNCTIONAL OUTCOMES</b>             |                                |                                   |                                  |                |
|                                        | <b>(n=87)</b>                  | <b>(n=44)</b>                     | 0.39 (0.09, 1.68)**              | 0.20**         |
| <i>No Major Deficits, n (%)</i>        | 25 (28.7%)                     | 5 (11.4%)                         |                                  |                |
| <i>Major Disability or Coma, n (%)</i> | 62 (71.3%)                     | 39 (88.6%)                        |                                  |                |

\*adjusted for age, sex, race, initial cardiac rhythm, admitting diagnosis, heart failure and myocardial infarction during admission, co-morbidities at time of cardiac arrest, time of cardiac arrest, use of a hospital-wide code blue, treatment interventions (intra-aortic balloon pump, pulmonary artery catheter, and hemodialysis), hospital-bed type, and hospital size.

\*\*For neurological and functional outcomes, model comparisons were made between those survivors discharged with no major deficits vs. those with a moderate degree of disability or worse.
